# Supplementary material for: Study on the Occurrence of Artificial Sweeteners, Parabens, and Other Emerging Contaminants in Hospital Wastewater Using LC-QToF-MS Target Screening Approach
Source: MDPI journal article supplement (doi:10.3390/w15050936), 2023-02-28
Supplement: s1 [file s1]

## **Supplementary Material**

### **Study on the occurrence of artificial sweeteners, parabens and other emerging contaminants in hospital wastewater using LC-QToF-MS target screening approach**

Olga S. Arvaniti<sup>1,2</sup>, Georgios Gkotsis<sup>3</sup>, Maria-Christina Nika<sup>3</sup>, Stelios Gyparakis<sup>4</sup>, Thrassyvoulos Manios<sup>4</sup>, Nikolaos S. Thomaidis<sup>3</sup>, Michalis S. Fountoulakis<sup>1</sup>, Athanasios S. Stasinakis<sup>1\*</sup>

<sup>1</sup>Water and Air Quality Laboratory, Department of Environment, University of the Aegean, University Hill, Mytilene 81100, Greece

<sup>2</sup>Department of Agricultural Development, Agrofood and Management of Natural Resources, National and Kapodistrian University of Athens, Psachna 34400, Greece

<sup>3</sup>Laboratory of Analytical Chemistry, Department of Chemistry, National and Kapodistrian University of Athens, Athens 15771, Greece

<sup>4</sup>Department of Agriculture, Hellenic Mediterranean University, Estavromenos, Heraklion 71410, Crete, Greece

**Number of supplementary tables: 5**

**Number of supplementary figures: 2**

**Section A:** Quality Assurance and Quality Control (QA/QC) protocol followed during the sample preparation and instrumental analysis

**Table S1.** CAS number, chemical formula, molecular weight, pKa, and log K<sub>ow</sub> values of 27 detected and quantified emerging contaminants.

| Compounds                                   | CAS number  | Chemical formula                                               | M.W.   | pKa  | log K <sub>ow</sub> |
|---------------------------------------------|-------------|----------------------------------------------------------------|--------|------|---------------------|
| <i>Artificial sweeteners</i>                |             |                                                                |        |      |                     |
| Acesulfame                                  | 33665-90-6  | C <sub>4</sub> H <sub>5</sub> NO <sub>4</sub> S                | 163.15 | 2.0  | -1.33               |
| Cyclamic acid                               | 100-88-9    | C <sub>6</sub> H <sub>13</sub> NO <sub>3</sub> S               | 179.24 | 1.71 | -1.61               |
| Saccharine                                  | 128-44-9    | C <sub>7</sub> H <sub>5</sub> NO <sub>3</sub> S                | 183.19 | 1.31 | 0.91                |
| Sucralose                                   | 56038-13-2  | C <sub>12</sub> H <sub>19</sub> Cl <sub>3</sub> O <sub>8</sub> | 397.6  | 11.9 | -1.00               |
| <i>Personal care products</i>               |             |                                                                |        |      |                     |
| Benzophenon 3                               | 131-57-7    | C <sub>14</sub> H <sub>12</sub> O <sub>3</sub>                 | 228.24 | 7.1  | 3.79                |
| Galaxolide                                  | 1222-05-5   | C <sub>18</sub> H <sub>26</sub> O                              | 258.4  | 8.24 | 5.90                |
| Galaxolidone                                | 507442-49-1 | C <sub>18</sub> H <sub>24</sub> O <sub>2</sub>                 | 272.4  | -6.9 | 5.34                |
| Ethylparaben                                | 120-47-8    | C <sub>9</sub> H <sub>10</sub> O <sub>3</sub>                  | 166.17 | 8.34 | 2.47                |
| Methylparaben                               | 99-76-3     | C <sub>8</sub> H <sub>8</sub> O <sub>3</sub>                   | 152.15 | 8.5  | 1.96                |
| Propylparaben                               | 94-13-3     | C <sub>10</sub> H <sub>12</sub> O <sub>3</sub>                 | 180.20 | 8.5  | 3.04                |
| <i>Coffee and tobacco-related compounds</i> |             |                                                                |        |      |                     |
| Caffeine                                    | 95789-13-2  | C <sub>8</sub> H <sub>10</sub> N <sub>4</sub> O <sub>2</sub>   | 194.19 | 14.0 | -0.07               |
| Theobromine                                 | 83-67-0     | C <sub>7</sub> H <sub>8</sub> N <sub>4</sub> O <sub>2</sub>    | 180.16 | 9.9  | -0.78               |
| Nicotine                                    | 54-11-5     | C <sub>10</sub> H <sub>14</sub> N <sub>2</sub>                 | 162.23 | 8.11 | 1.17                |
| Cotinine                                    | 486-56-6    | C <sub>10</sub> H <sub>12</sub> N <sub>2</sub> O               | 176.21 | 4.79 | 0.39                |
| Hydroxycotinine                             | 803-421-5   | C <sub>10</sub> H <sub>12</sub> N <sub>2</sub> O <sub>2</sub>  | 192.21 | 13.1 | -0.32               |
| <i>Industrial chemicals</i>                 |             |                                                                |        |      |                     |
| Benzododecinium                             | 10328-35-5  | C <sub>21</sub> H <sub>38</sub> N <sup>+</sup>                 | 304.5  | 18.1 | 2.63                |
| 2-Hydroxybenzothiazole (2-OH-BTH)           | 934-34-9    | C <sub>7</sub> H <sub>5</sub> NOS                              | 151.19 | 8.44 | 2.49                |
| Benzotriazole (BTR)                         | 273-02-9    | C <sub>6</sub> H <sub>5</sub> N <sub>3</sub>                   | 119.12 | 8.37 | 1.44                |
| Lauryl diethanolamide (Lauryl-DEA)          | 120-40-1    | C <sub>16</sub> H <sub>33</sub> NO <sub>3</sub>                | 287.44 | 14.1 | 3.48                |

| <b>Compounds</b>                                           | <b>CAS number</b> | <b>Chemical formula</b>                         | <b>M.W.</b> | <b>pKa</b> | <b>log K<sub>ow</sub></b> |
|------------------------------------------------------------|-------------------|-------------------------------------------------|-------------|------------|---------------------------|
| N,N-Dimethyldecylamine (N,N-diMe-DA)                       | 1120-24-7         | C <sub>12</sub> H <sub>27</sub> N               | 185.35      | 9.78       | 4.84                      |
| N,N-Dimethyldodecylamine (N,N-diMe-DDA)                    | 112-18-5          | C <sub>14</sub> H <sub>31</sub> N               | 213.40      | 9.97       | 5.4                       |
| N,N-Dimethyldodecylamine N-oxide (N,N-diMe-DDA-N-oxide)    | 1643-20-5         | C <sub>14</sub> H <sub>31</sub> NO              | 229.40      | 4.48       | 2.23                      |
| N,N-Dimethyltetradecylamine (N,N-diMe-TDA)                 | 112-75-4          | C <sub>16</sub> H <sub>35</sub> N               | 241.46      | 9.78       | 5.25                      |
| N,N-Dimethyltetradecylamine-N-oxide (N,N-diMe-TDA-N-oxide) | 3332-27-2         | C <sub>16</sub> H <sub>35</sub> NO              | 257.45      | 4.01       | 5.28                      |
| N-Methyldodecylamine (N-Me-DDA)                            | 7311-30-0         | C <sub>13</sub> H <sub>29</sub> N               | 199.38      | 10.8       | 5.41                      |
| Triethylphosphate                                          | 78-40-0           | C <sub>6</sub> H <sub>15</sub> O <sub>4</sub> P | 182.15      | -9.1       | 0.80                      |
| Triethylcitrate                                            | 77-93-0           | C <sub>12</sub> H <sub>20</sub> O <sub>7</sub>  | 276.28      | 11.6       | 0.33                      |

**Table S2.** Information on the samples collected in this study (dates, sampling points)

| Code of HWW | Date of sampling | Sampling point |
|-------------|------------------|----------------|
|             | (DD-MM-YYYY)     |                |
| Period 1    |                  |                |
| HWW 1       | 2/11/2020        | A              |
| HWW 2       |                  | B              |
| HWW 3       | 3/11/2020        | A              |
| HWW 4       |                  | B              |
| HWW 5       | 4/11/2020        | A              |
| HWW 6       |                  | B              |
| HWW 7       | 5/11/2020        | A              |
| HWW 8       |                  | B              |
| HWW 9       | 6/11/2020        | A              |
| HWW 10      |                  | B              |
| Period 2    |                  |                |
| HWW 11      | 15/2/2021        | A              |
| HWW 12      |                  | B              |
| HWW 13      | 16/2/2021        | A              |
| HWW 14      |                  | B              |
| HWW 15      | 17/2/2021        | A              |
| HWW 16      |                  | B              |
| HWW 17      | 18/2/2021        | A              |
| HWW 18      |                  | B              |
| HWW 19      | 19/2/2021        | A              |
| HWW 20      |                  | B              |

## **Section A**

### **Quality Assurance and Quality Control (QA/QC) protocol followed during the sample preparation and instrumental analysis**

A mixture of isotopically labeled compounds was spiked in every sample before extraction to correct reproducibility issues among the samples of the same or different batches and variabilities in instrumental parameters such as injection volume and MS sensitivity and ensure sufficient recovery of the contaminants from the analysed matrix. Method blanks (reagent blanks) were prepared in every batch of samples to assess any external contamination which might have been introduced during the sample preparation of the final extracts for analysis, whereas spiked and matrix-matched samples with a mixture of environmental contaminants were also prepared and examined with the samples to monitor the recovery and matrix effect for the tested compounds.

Apart from the regular system maintenance, a QA/QC protocol was followed during every instrumental analysis to assure the separation efficiency of the analytes of interest and the good operation of the HRMS system. For a reliable quantitative analysis, blank solutions (instrument blanks) were measured after a sample analysis to monitor and reduce possible memory effect phenomena (or carry-over of analytes). A mix of known analytes (Retention Time Index (RTI) calibrant substances) was used to assess the stability of retention time during instrumental analysis and evaluate potential retention time drift across different dates of analysis (**Aalizadeh et al., 2021- <https://doi.org/10.1021/acs.analchem.1c02348>**). A QC sample ran every 10-15 injections to ensure the good operation and high sensitivity of the system. Before starting the screening of the chromatograms, the sensitivity of internal standards in each sample was tested to assure satisfactory recovery and proper injection of the extracts into the chromatographic system. Relative areas (peak area of the analyte divided by the peak area of internal standard) were used for quantifying the detected analytes, therefore potential variations in instrumental sensitivity were accounted in the different batches of analysis.

### **Instrumental analysis**

The samples were analysed by two chromatographic systems, for positively and negatively ionized compounds. For positive ionization (PI) mode the mobile phase consisted of (A) Milli-Q H<sub>2</sub>O:MeOH (90:10, v/v) and (B) MeOH, both containing 5 mM ammonium formate and 0.01% formic acid, whereas in negative ionization (NI) mode mobile phase was composed of (A) Milli-Q H<sub>2</sub>O:MeOH (90:10, v/v) and (B) MeOH, both containing 5 mM ammonium acetate. The LC elution program for both analyses is presented in **Table S2**. The injection volume was fixed at 5  $\mu$ L. The QToF-MS system was equipped with an electrospray ionization (ESI) interface. The ESI parameters used were the following: capillary voltage, 2500 V (for PI) and 3500 V (for NI); end plate offset, 500 V; nebulizer pressure, 2 bar (N<sub>2</sub>); drying gas, 8 L/min (N<sub>2</sub>); and drying temperature, 200 °C.

**Table S3.** The gradient elution program of LC-HRMS analysis.

| <b>Time (min)</b> | <b>Flow rate (mL/min)</b> | <b>%A</b> | <b>%B</b> |
|-------------------|---------------------------|-----------|-----------|
| 0                 | 0.2                       | 99        | 1         |
| 1.0               | 0.2                       | 99        | 1         |
| 3.0               | 0.2                       | 61        | 39        |
| 14.0              | 0.4                       | 0.1       | 99.9      |
| 16.0              | 0.48                      | 0.1       | 99.9      |
| 16.1              | 0.48                      | 99        | 1         |
| 19.0              | 0.48                      | 99        | 1         |
| 19.1              | 0.2                       | 99        | 1         |
| 20.0              | 0.2                       | 99        | 1         |

A QToF-MS external calibration was performed daily before analysis, with a sodium formate solution (10 mM). For internal calibration, a segment in every chromatogram (0.1-0.25 min) was used, where the calibration solution was injected at the beginning of each run. The theoretical exact masses of calibration ions with formulas Na(NaCOOH)<sub>1-14</sub> in the range of 40–800 Da, were used for calibration. The instrument provided a typical resolving power of 36,000–40,000 during calibration. The QToF-MS system operated in two different acquisition modes. In Data Independent Acquisition (DIA) mode, or broadband collision-induced dissociation (bbCID), two sequential full scan events were acquired. In the first scan, a low collision energy (4 eV) was applied to record MS full data, whereas in the second scan a higher collision energy (25 eV) resulted in a MS/MS all-ion-fragmentation, both in the range  $m/z$  50–1000. In Data Dependent Acquisition (DDA) mode, after acquiring MS full scan spectrum (4

eV,  $m/z$  50–1000), the fragmentation of the 5 most abundant ions was triggered at collision energies dependent on their ion mass and charge state. The scan rate was 2 Hz.

**Table S4.** UHPLC-ESI-QToF MS identification data for the detected compounds.

| Compounds                                          | Retention time (min) | Ion type           | Precursor Ion (m/z) | Main fragment ions in bbCID spectra (m/z) |
|----------------------------------------------------|----------------------|--------------------|---------------------|-------------------------------------------|
| <b><i>Artificial Sweeteners</i></b>                |                      |                    |                     |                                           |
| Acesulfame                                         | 2.3                  | [M-H] <sup>-</sup> | 161.9867            | 161.9867, 82.0298, 98.0248, 77.9655       |
| Cyclamic acid                                      | 4.1                  | [M-H] <sup>-</sup> | 178.0543            | 79.9574, 178.0543, 80.9652, 95.9761       |
| Saccharine                                         | 3.1                  | [M-H] <sup>-</sup> | 181.9917            | 181.9917, 105.9602, 61.97.7               |
| Sucralose                                          | 4.7                  | [M-H] <sup>-</sup> | 395.0073            | 395.0073, 359.0299, 59.0136               |
| <b><i>Personal Care Products</i></b>               |                      |                    |                     |                                           |
| Benzophenon 3                                      | 10.8                 | [M+H] <sup>+</sup> | 229.0859            | 105.0334, 183.0805, 77.0386               |
| Galaxolide                                         | 13.9                 | [M+H] <sup>+</sup> | 259.2056            | 175.1104, 147.0791, 161.0944              |
| Galaxolidone                                       | 12.0                 | [M+H] <sup>+</sup> | 273.1849            | 138.0662, 83.0604, 110.0713, 69.0447      |
| Ethylparaben                                       | 7.1                  | [M-H] <sup>-</sup> | 165.0557            | 136.0158, 137.0236, 165.0549              |
| Methylparaben                                      | 6.0                  | [M-H] <sup>-</sup> | 151.0401            | 136.0163, 151.0401                        |
| Propylparaben                                      | 8.3                  | [M-H] <sup>-</sup> | 179.0714            | 107.0315, 136.0160                        |
| <b><i>Coffee and tobacco-related compounds</i></b> |                      |                    |                     |                                           |
| Caffeine                                           | 4.2                  | [M+H] <sup>+</sup> | 195.0877            | 67.0291, 138.0662, 69.0447, 110.0713      |
| Theobromine                                        | 3.3                  | [M+H] <sup>+</sup> | 181.0720            | 84.0808, 80.0495, 117.0573, 130.0651      |
| Nicotine                                           | 2.4                  | [M+H] <sup>+</sup> | 163.1230            | 84.0808, 80.0495, 117.0573, 130.0651      |
| Cotinine                                           | 3.8                  | [M+H] <sup>+</sup> | 177.1022            | 80.0495, 98.0600, 70.0651, 177.1014       |
| Hydroxycotinine                                    | 3.1                  | [M+H] <sup>+</sup> | 193.0972            | 80.0495, 134.0600                         |
| <b><i>Industrial chemicals</i></b>                 |                      |                    |                     |                                           |
| Benzododecinium                                    | 11.2                 | [M] <sup>+</sup>   | 304.2999            | 91.0542, 58.0651, 212.2373                |



| Compounds                                                  | Retention time (min) | Ion type  | Precursor Ion (m/z) | Main fragment ions in bbCID spectra (m/z) |
|------------------------------------------------------------|----------------------|-----------|---------------------|-------------------------------------------|
| 2-Hydroxybenzothiazole (2-OH-BTH)                          | 6.5                  | $[M+H]^+$ | 152.0165            | 124.0226, 119.0364, 152.0165, 134.0049    |
| Benzotriazole (BTR)                                        | 4.8                  | $[M+H]^+$ | 120.0556            | 65.0380, 120.0556, 92.0486, 121.0582      |
| Lauryl diethanolamide (Lauryl-DEA)                         | 11.7                 | $[M+H]^+$ | 288.2533            | 88.0758, 97.0820, 124.0868, 226.2136      |
| N,N-Dimethyldecylamine (N,N-diMe-DA)                       | 8.6                  | $[M+H]^+$ | 186.2216            | 186.2216, 187.2234, 188.2258              |
| N,N-Dimethyldodecylamine (N,N-diMe-DDA)                    | 10.4                 | $[M+H]^+$ | 214.2529            | 214.2529, 215.2556, 216.2586              |
| N,N-Dimethyldodecylamine N-oxide (N,N-diMe-DDA-N-oxide)    | 11.2                 | $[M+H]^+$ | 230.2478            | 128.1419, 205.2094, 212.2362              |
| N,N-Dimethyltetradecylamine (N,N-diMe-TDA)                 | 11.8                 | $[M+H]^+$ | 242.2842            | 242.2848, 243.2868, 244.2901              |
| N,N-Dimethyltetradecylamine-N-oxide (N,N-diMe-TDA-N-oxide) | 12.6                 | $[M+H]^+$ | 258.2791            | 113.1262, 226.6465, 240.2678              |
| N-Methyldodecylamine (N-Me-DDA)                            | 10.5                 | $[M+H]^+$ | 200.2373            | 200.2373, 201.2397, 202.2424              |
| Triethyl Phosphate                                         | 6.2                  | $[M+H]^+$ | 183.0781            | 127.0164, 155.0480, 183.0798              |
| Triethyl Citrate                                           | 6.9                  | $[M+H]^+$ | 277.1282            | 129.0170, 131.0334, 139.0011              |

**Table S5.** Performance of method applied for the analyses of emerging contaminants.

| Compounds                            | LOD<br>(µg/L) | LOQ<br>(µg/L) | % Recovery  | %RSD (n=3) | %Matrix<br>effect |
|--------------------------------------|---------------|---------------|-------------|------------|-------------------|
|                                      |               |               | C: 0.5 µg/L |            |                   |
| Artificial Sweeteners                |               |               |             |            |                   |
| Acesulfame                           | 0.720         | 2.16          | 89          | 9.7        | -58               |
| Cyclamic acid                        | 0.345         | 1.04          | 107         | 11         | -15               |
| Saccharine                           | 0.0888        | 0.267         | 104         | 5.9        | -12               |
| Sucralose                            | 0.807         | 2.42          | 114         | 5.3        | -22               |
| Personal Care Products               |               |               |             |            |                   |
| Benzophenon 3                        | 0.0947        | 0.284         | 84          | 4.6        | 24                |
| Galaxolide                           | 0.0113        | 0.0339        | 60          | 8.2        | -35               |
| Galaxolidone                         | 0.0000517     | 0.000155      | 62          | 10         | -37               |
| Ethylparaben                         | 0.0264        | 0.0793        | 78          | 8.6        | -45               |
| Methylparaben                        | 0.0412        | 0.124         | 80          | 9.2        | -30               |
| Propylparaben                        | 0.809         | 2.43          | 75          | 8.5        | -29               |
| Coffee and tobacco-related compounds |               |               |             |            |                   |
| Caffeine                             | 0.138         | 0.413         | 101         | 10         | -41               |
| Theobromine                          | 0.0403        | 0.121         | 77          | 6.3        | 8                 |
| Nicotine                             | 0.0690        | 0.207         | 83          | 3.0        | -56               |
| Cotinine                             | 0.0169        | 0.0508        | 81          | 6.2        | -20               |
| Hydroxycotinine                      | 0.0438        | 0.131         | 96          | 5.6        | -35               |
| Industrial chemicals                 |               |               |             |            |                   |
| Benzododecinium                      | 0.832         | 2.50          | 103         | 10         | -21               |
| 2-hydroxybenzothiazole (2-OH-BTH)    | 0.172         | 0.517         | 105         | 13         | -41               |
| Benzotriazole (BTR)                  | 0.0196        | 0.0587        | 85          | 13         | -56               |

| Compounds                                                  | <i>LOD</i><br>( $\mu\text{g/L}$ ) | <i>LOQ</i><br>( $\mu\text{g/L}$ ) | % Recovery                               | %RSD (n=3) | %Matrix effect |
|------------------------------------------------------------|-----------------------------------|-----------------------------------|------------------------------------------|------------|----------------|
|                                                            |                                   |                                   | <i>C: 0.5 <math>\mu\text{g/L}</math></i> |            |                |
| Lauryl diethanolamide (Lauryl-DEA)                         | 0.00453                           | 0.0136                            | 80                                       | 9.5        | -32            |
| N,N-Dimethyldecylamine (N,N-diMe-DA)                       | 0.00739                           | 0.0222                            | 75                                       | 12         | -22            |
| N,N-Dimethyldodecylamine (N,N-diMe-DDA)                    | 0.00812                           | 0.0243                            | 68                                       | 11         | -30            |
| N,N-Dimethyldodecylamine N-oxide (N,N-diMe-DDA-N-oxide)    | 0.0110                            | 0.0329                            | 75                                       | 13         | -28            |
| N,N-Dimethyltetradecylamine (N,N-diMe-TDA)                 | 0.00620                           | 0.0186                            | 80                                       | 14         | -39            |
| N,N-Dimethyltetradecylamine-N-oxide (N,N-diMe-TDA-N-oxide) | 0.0105                            | 0.0314                            | 86                                       | 9.4        | -37            |
| N-Methyldodecylamine (N-Me-DDA)                            | 0.00406                           | 0.0122                            | 104                                      | 12         | -40            |
| Triethyl Phosphate                                         | 0.0320                            | 0.0960                            | 94                                       | 5.0        | -42            |
| Triethyl Citrate                                           | 0.0191                            | 0.0574                            | 76                                       | 6.5        | -50            |

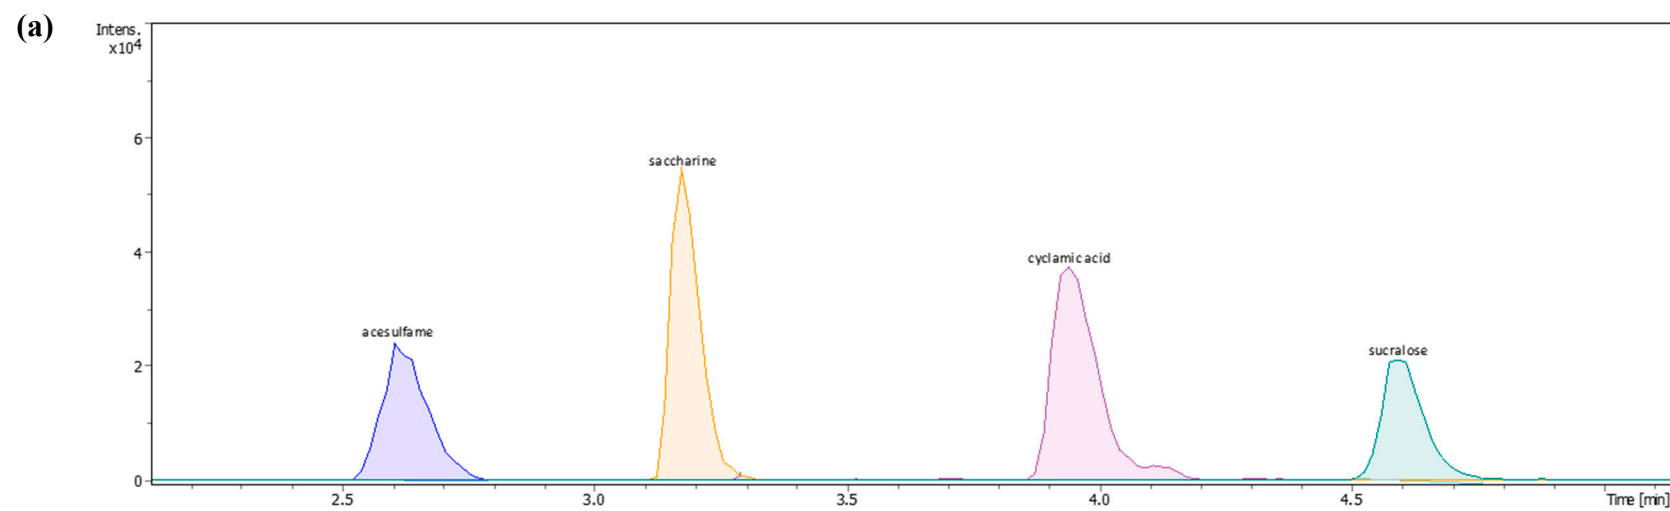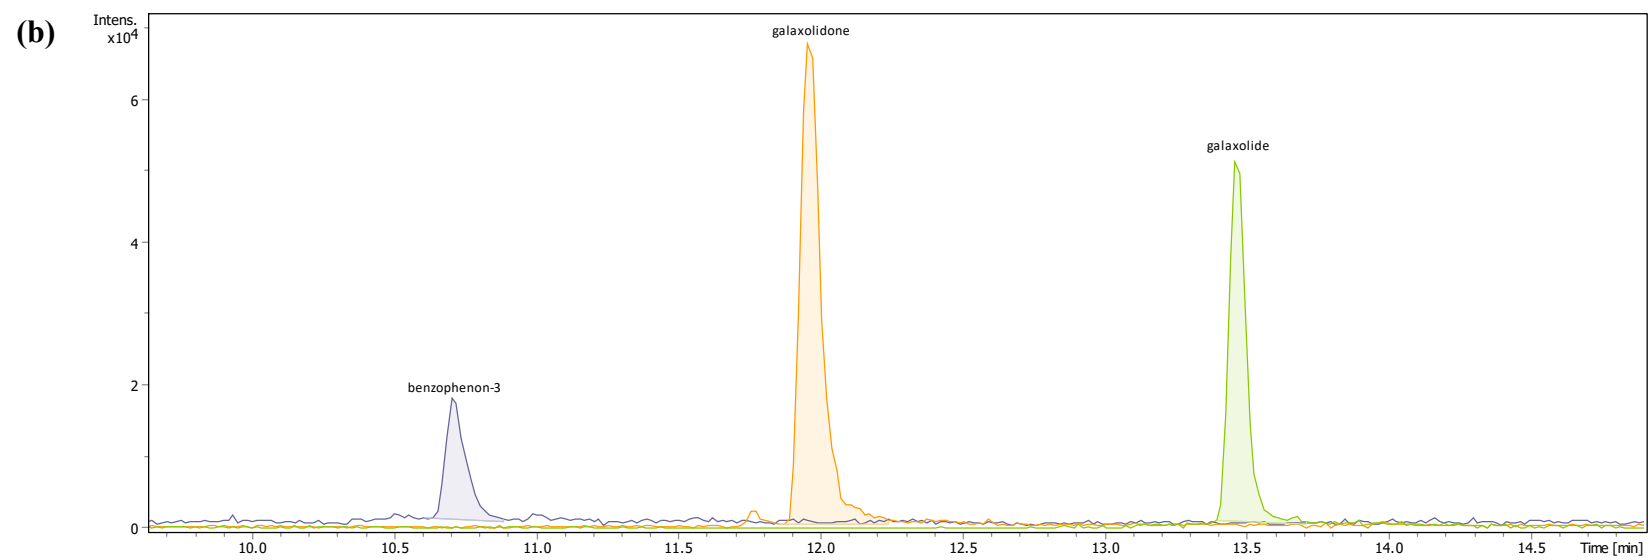

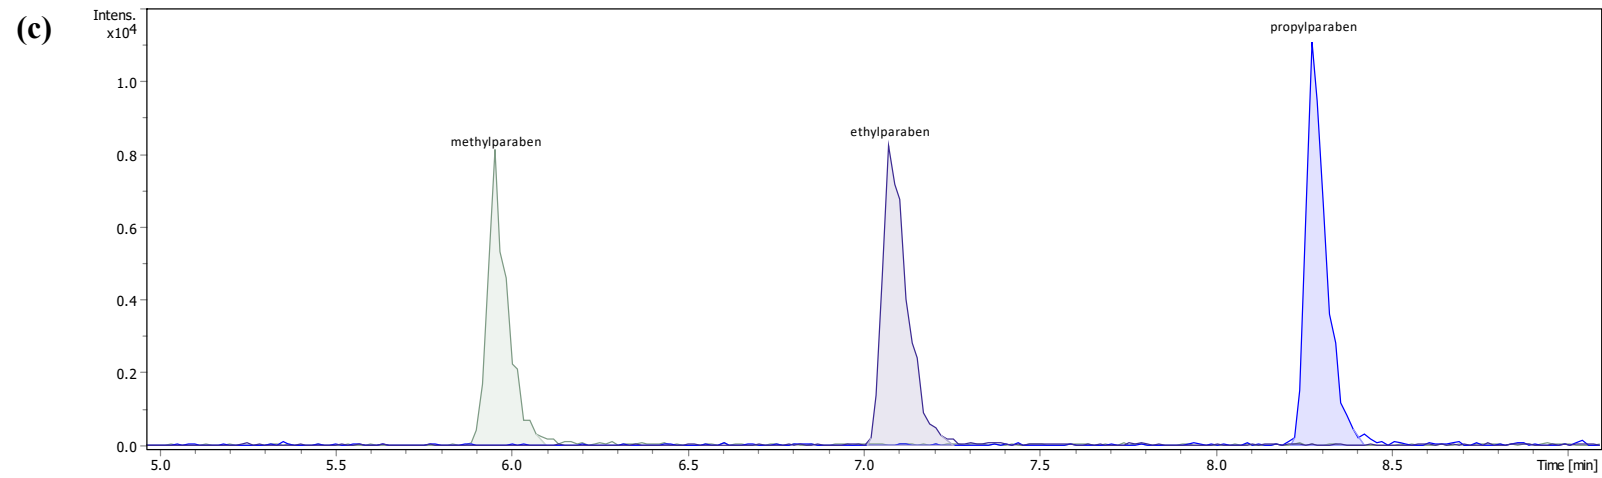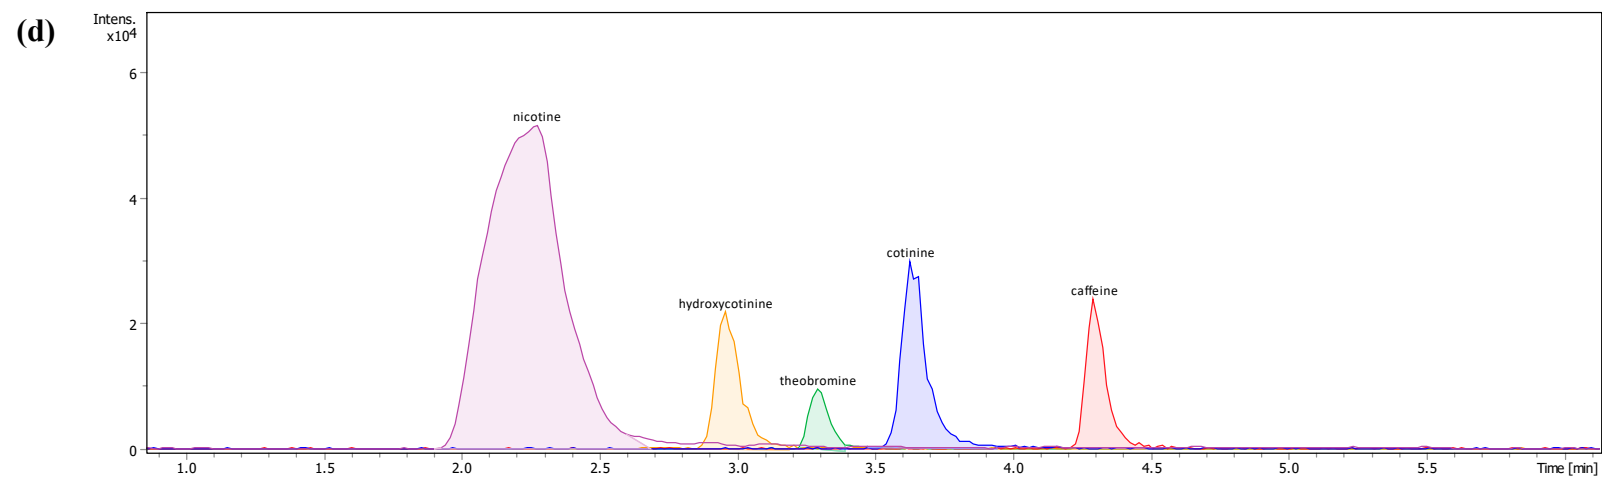

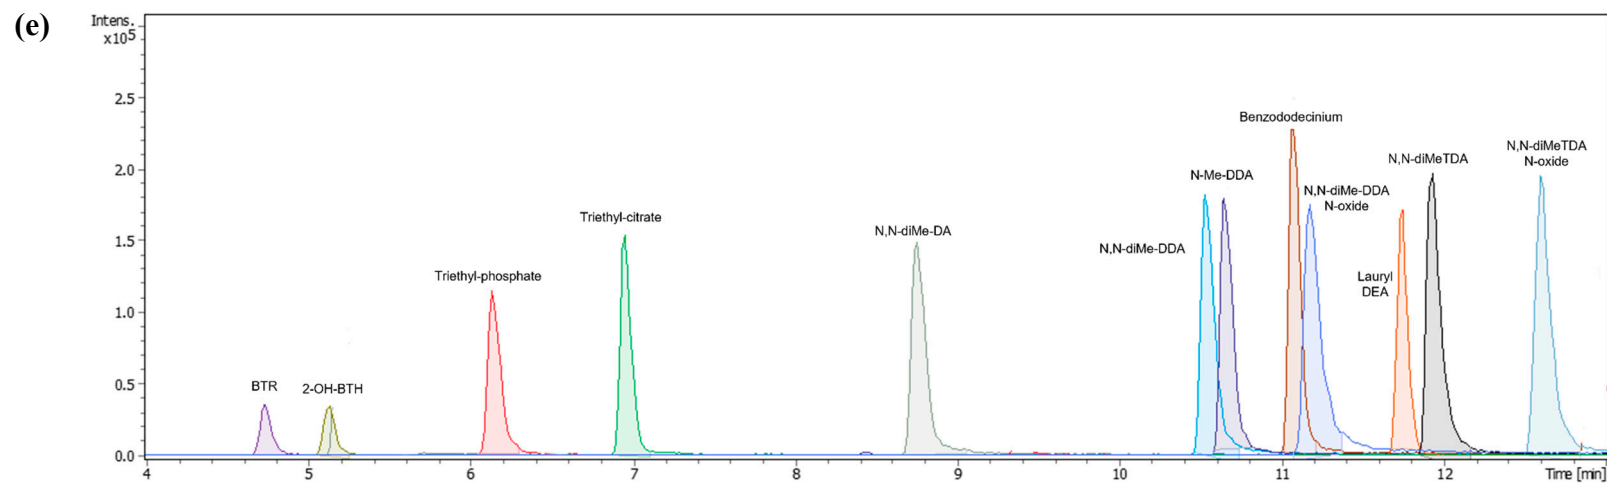

**Figure S1.** Extracted Ion Chromatograms for the detected compounds; (a) artificial sweeteners by LC-ESI(-)-QToF-MS, (b) personal care products by LC-ESI(+)-QToF-MS, (c) personal care products by LC-ESI(-)-QToF MS, (d) coffee and tobacco-related compounds by LC-ESI(+)-QToF-MS, and (e) industrial chemicals by LC-ESI(+)-QToF-MS.

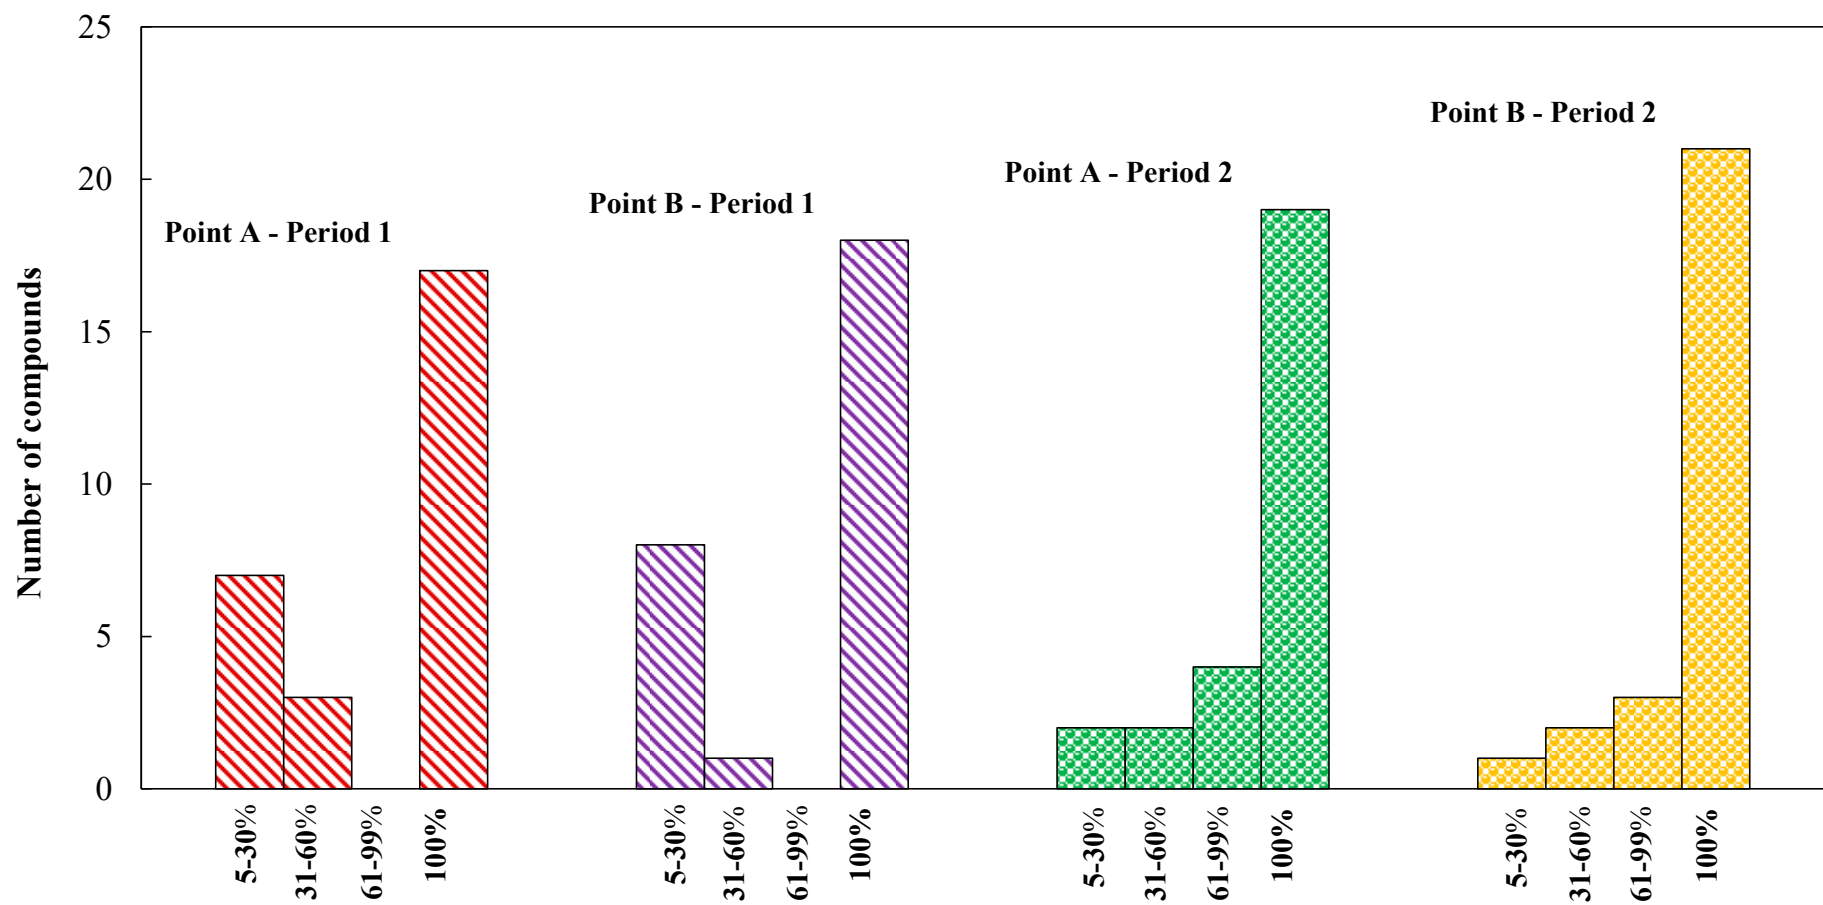

**Figure S2.** % Frequency of appearance (% FoA) of the detected ECs in Building A (Point A) and entire hospital (Point B) of the two studied periods.
